# Supplementary material for: Development of a fluorescence assay for highly sensitive detection of Pseudomonas aeruginosa based on an aptamer-carbon dots/graphene oxide system
Source: Royal Society of Chemistry journal article supplement (doi:10.1039/c8ra04819c), 2018-01-01
Supplement: c8ra04819c1.pdf [file c8ra04819c1.pdf]

## Supplementary information

### 1. Selection procedures and conditions in every round of WB-SELEX

**Table S1.** The selection conditions of aptamers to *P. aeruginosa*.

| Round | Bacterial cells ( $\mu\text{l}$ ) | ssDNA (pmol) | Binding time (h) | Washing times | PCR cycles |
|-------|-----------------------------------|--------------|------------------|---------------|------------|
| 1     | 50+50+50 <sup>a</sup>             | 1300         | 0.5              | 0             | 30         |
| 2     | 500                               | 800          | 1.5              | 1             | 25         |
| 3     | 500                               | 750          | 1.5              | 1             | 25         |
| 4     | 500                               | 625          | 1                | 2             | 25         |
| 5     | 500                               | 725          | 1                | 2             | 20         |
| 6     | 500                               | 300          | 1                | 2             | 20         |
| 7     | 200                               | 300          | 0.5              | 3             | 20         |
| 8     | 200                               | 300          | 0.5              | 3             | 15         |
| 9     | 100+100+10<br>0 <sup>b</sup>      | 300          | 1                | 0             | 15         |
| 10    | 100                               | 300          | 0.5              | 3             | 15         |
| 11    | 50                                | 100          | 0.5              | 4             | 15         |
| 12    | 50                                | 100          | 0.5              | 5             | 15         |
| 13    | 100+100+10<br>0 <sup>b</sup>      | 50           | 1                | 0             | 15         |
| 14    | 100+100+10<br>0 <sup>b</sup>      | 50           | 1.5              | 0             | 15         |
| 15    | 50                                | 50           | 0.5              | 6             | 15         |

<sup>a</sup> Volumes of each counter-selection bacteria (*E. coli* ATCC 25922, *B. subtilis* ATCC 6051 and *S. aureus* ATCC 12600) added in the reaction system in the first round. The volume is as equal as 50  $\mu\text{l}$  and the cell density from the culture of each counter-selection bacteria was at  $1 \times 10^7$  CFU  $\text{ml}^{-1}$ .

<sup>b</sup> Volumes of each counter-selection bacteria (*E. coli* ATCC 25922, *B. subtilis* ATCC 6051 and *S. aureus* ATCC 12600) added in the reaction systems at the other rounds of counter-selection. The volume is as equal as 100  $\mu\text{l}$  and the cell density from the culture of each counter-selection bacteria was at  $1 \times 10^7$  CFU  $\text{ml}^{-1}$ .

## 2. Sequence abundances for five aptamer candidates identified by HTS

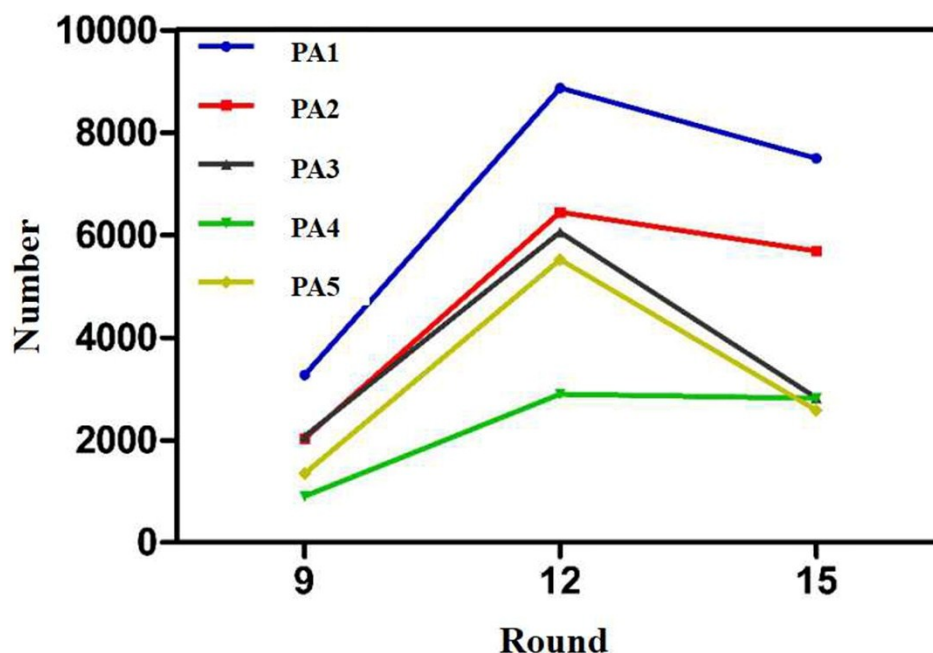

**Fig. S1.** Strand numbers for aptamer candidates with top five highest abundances in ssDNA pools from the 9<sup>th</sup>, the 12<sup>th</sup> and the 15<sup>th</sup> rounds revealed by HTS. The strand number for PA1, PA2, PA3 PA4, PA5 in the ssDNA pool from the 9<sup>th</sup> round was 3273, 2028, 2071, 902 and 1349, respectively. The total strand number obtained by HTS was 1820659. The strand number for PA1, PA2, PA3 PA4, PA5 in the ssDNA pool from the 12<sup>th</sup> round was 8874, 6446, 6056, 2898 and 5521, respectively. The total strand number obtained by HTS was 1712478. The strand number for PA1, PA2, PA3 PA4, PA5 in the ssDNA pool from the 15<sup>th</sup> round was 7498, 5686, 2824, 2814 and 2583, respectively. The total strand number obtained by HTS was 1729984. The abundances of these aptamer candidates reached their maximum at the round of 12<sup>th</sup>.

### 3. Secondary structure of aptamer candidates

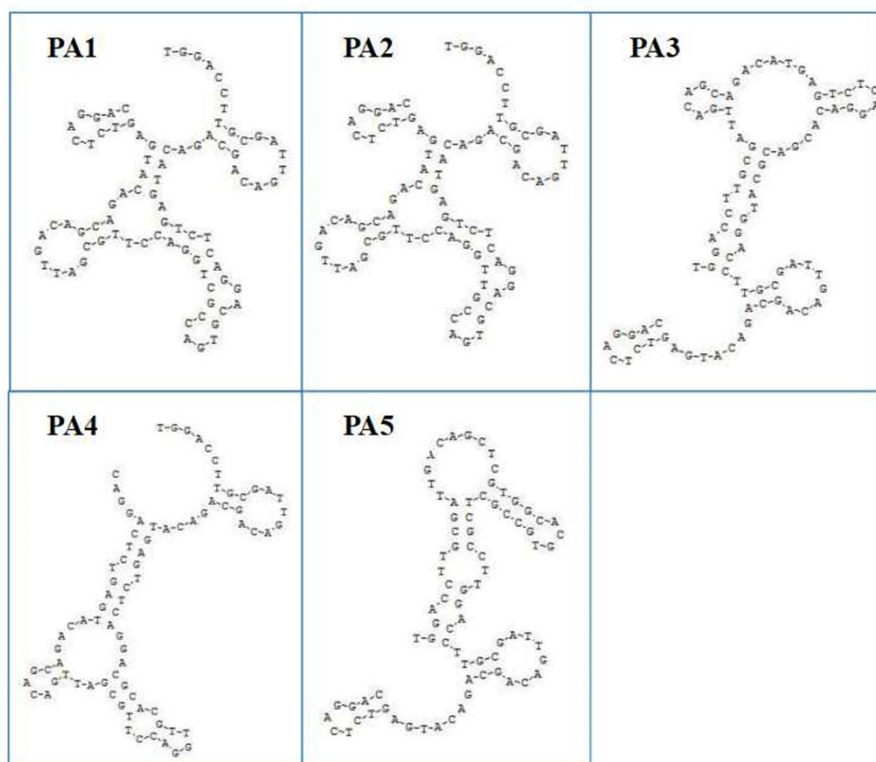

**Fig. S2.** Secondary stem-loop structure for each of the five aptamer candidates given by *Mfold*.

#### 4. Characterization of synthesized CDs and aptamer-CDs conjugates

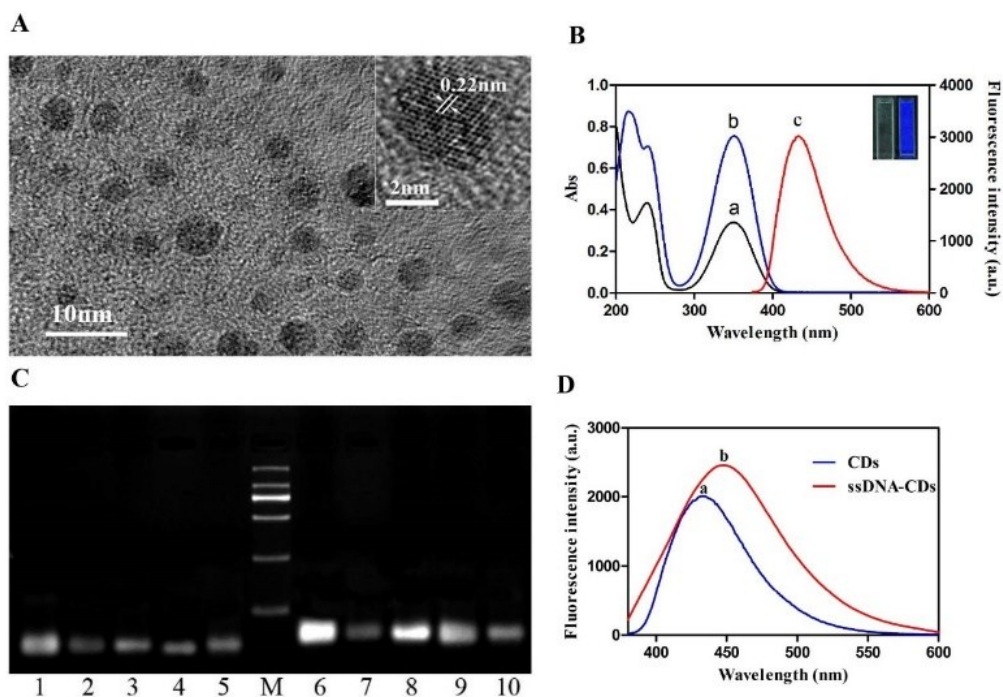

**Fig. S3.** (A) The HRTEM characterization of CDs, the average diameter of as-prepared CDs in this work was 4.05 nm with the lattice spacing of 0.22 nm; (B) UV-vis spectra (curve a, black), photoluminescence excitation (curve b, blue) and photoluminescence emission spectra (curve c, red) of CDs. In the UV-vis spectra, the peak wavelength was at 350nm (Fig. 3S-B, curve a). The fluorescence excitation and emission spectra demonstrated that the maximum excitation wavelength of the as-prepared CDs was 355 nm (Fig. 3S-B, curve b) and the maximum emission wavelength of them was 437 nm (Fig. 3S-B, curve c). The CDs could exhibit a blue color under the irradiation of a UV lamp; (C) Agarose gel electrophoresis of aptamer candidates and aptamer-CDs conjugates. Lane 1-5: ssDNA aptamer candidates of PA1, PA2, PA3, PA4, PA5, respectively. Lane 6-10: PA1-CDs, PA2-CDs, PA3-CDs, PA4-CDs PA5-CDs, respectively. M: DL2000 DNA marker, 100bp, 250bp, 500bp, 750bp, 1000bp, 2000bp, from bottom to top. (D) The redshift of photoluminescence emission peak for PA1-CDs as a representative.

## 5. Determination of K<sub>d</sub> values for aptamer candidates

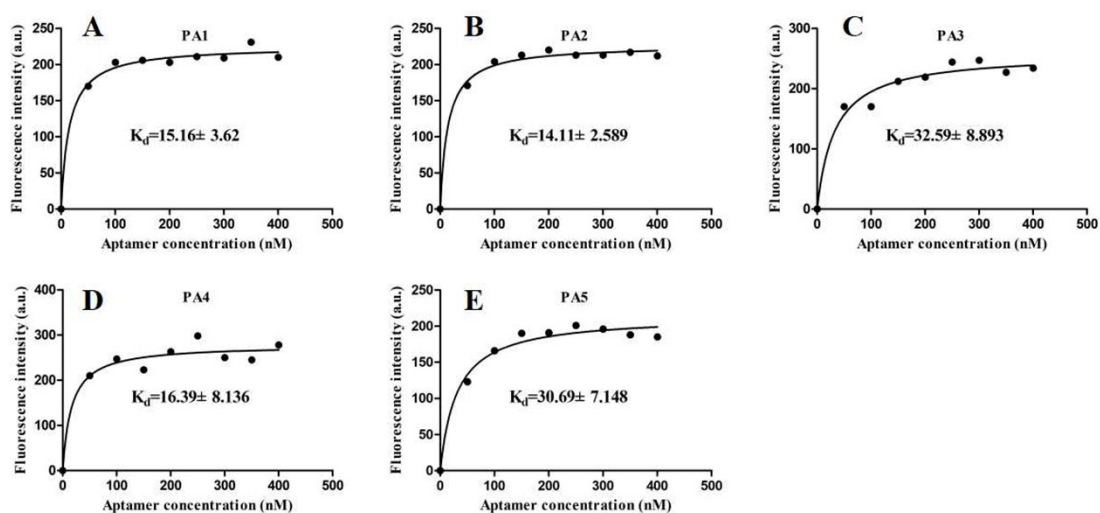

**Fig. S4.** Binding affinity of each aptamer candidate with the cells of *P. aeruginosa* determined by the corresponding aptamer-CDs probe. The equilibrium dissociation constants (K<sub>d</sub>) were calculated by non-linear regression analysis.

## 6. Optimization of reacting time for the fluorescence assay

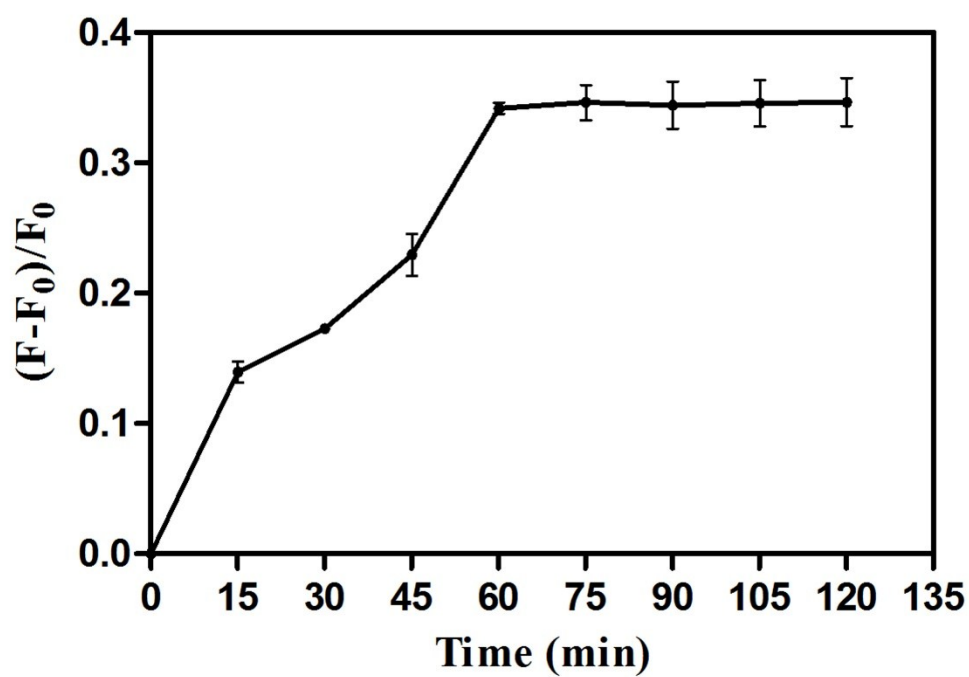

Fig. S5. Optimization of reacting time for the fluorescence assay.

7. Specificity of aptamer-CDs/GO system for *P. aeruginosa* ATCC27853 strain and different *P. aeruginosa* serotypes

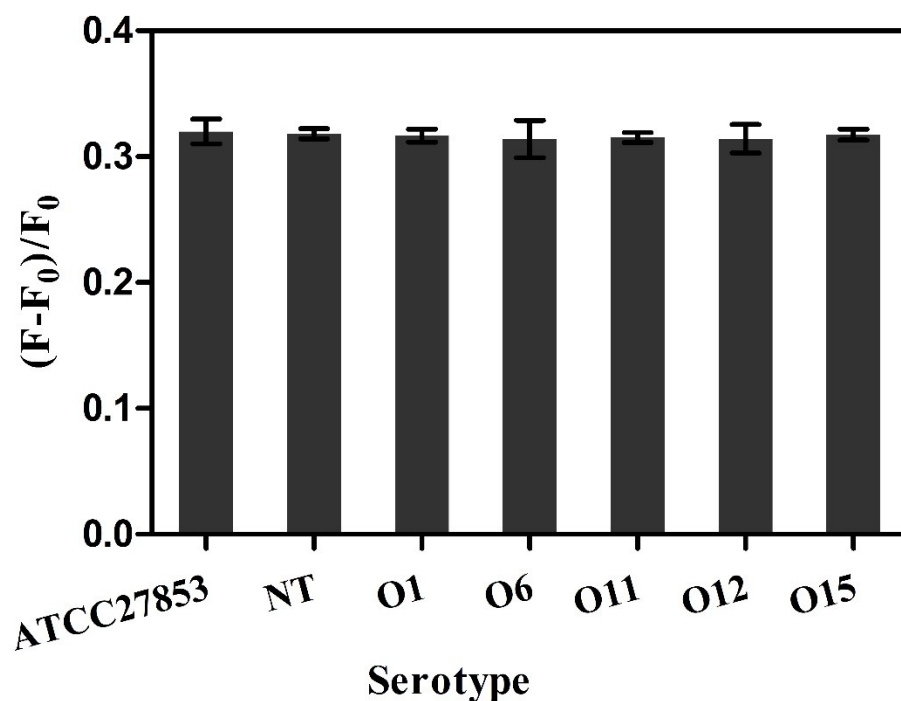

**Fig. S6.** Fluorescence recovery ratios of *P. aeruginosa* ATCC27853 strain and different *P. aeruginosa* serotypes. NT: not serotyped; O1: *P. aeruginosa* serotype O1; O6: *P. aeruginosa* serotype O6; O11: *P. aeruginosa* serotype O11; O12: *P. aeruginosa* serotype O12; O15: *P. aeruginosa* serotype O15. No significant difference among ATCC27853 strain and different *P. aeruginosa* serotypes was observed after calculated with the student's *t*-test.
